# Supplementary material for: Raman and X-ray Photoelectron Spectroscopic Study of Aqueous Thiol-Capped Ag-Zn-Sn-S Nanocrystals
Source: Preprints.org preprint supplement (doi:10.20944/preprints202105.0715.v1), 2021-05-31
Supplement: Supplementary file 1 [file supplementary]

# Raman and X-ray Photoelectron Spectroscopic Study of Aqueous Thiol-Capped Ag-Zn-Sn-S Nanocrystals

Volodymyr Dzhagan<sup>1,2</sup>, Oleksandr Selyshchev<sup>3</sup>, Yevhenii Havryliuk<sup>1,3</sup>, Nazar Mazur<sup>1</sup>, Oleksandra Raievska<sup>3,4,5</sup>, Oleksandr Stroyuk<sup>6</sup>, Serhiy Kondratenko<sup>2</sup>, A.P. Litvinchuk<sup>7</sup>, M.Ya. Valakh<sup>1</sup>, Dietrich R.T. Zahn<sup>3,4\*</sup>

<sup>1</sup>V. Lashkaryov Institute of Semiconductors Physics, National Academy of Sciences of Ukraine, 03038 Kyiv, Ukraine

<sup>2</sup>Physics Department, Taras Shevchenko National University of Kyiv, 60 Volodymyrs'ka str., 01601 Kyiv, Ukraine

<sup>3</sup>Semiconductor Physics, Chemnitz University of Technology, D-09107 Chemnitz, Germany

<sup>4</sup>Center for Materials, Architectures, and Integration of Nanomembranes (MAIN), Chemnitz University of Technology, D-09107 Chemnitz, Germany

<sup>5</sup>L.V. Pysarzhevsky Institute of Physical Chemistry, Nat. Acad. of Science of Ukraine, 03028 Kyiv, Ukraine

<sup>6</sup>Forschungszentrum Jülich GmbH, Helmholtz-Institut Erlangen Nürnberg für Erneuerbare Energien (HI ERN), 91058 Erlangen, Germany

<sup>7</sup>Texas Center for Superconductivity and Department of Physics, University of Houston, Houston, TX 77204-5002, USA

\*corresponding author, [zahn@physik.tu-chemnitz.de](mailto:zahn@physik.tu-chemnitz.de)

## Details of the synthesis of AZTS NCs with varied composition.

### *Ag<sub>x</sub>Cu<sub>1-x</sub>ZnSnS<sub>4</sub> (ACZTS) NC series*

General protocol: 3 mL H<sub>2</sub>O + 0.3 mL 0.5 M SnCl<sub>2</sub> in 4 M NaOH + 0.1 mL 5 M NH<sub>4</sub>OH + 3.0 mL 1.0 M MAA + 0.15 mL 1.0 M Zn(NO<sub>3</sub>)<sub>2</sub> + 3.0 mL (a mixture of different amounts of 0.1 M AgNO<sub>3</sub> + 0.1 M Cu(NO<sub>3</sub>)<sub>2</sub>) + 0.5 mL 1.0 M Na<sub>2</sub>S. Heating: 5 min.

*Note:* all solutions are prepared in DI water.

The following nominal compositions were prepared: Ag<sub>30</sub>Cu<sub>0</sub>Zn<sub>15</sub>Sn<sub>15</sub>S<sub>50</sub>, Ag<sub>25</sub>Cu<sub>5</sub>Zn<sub>15</sub>Sn<sub>15</sub>S<sub>50</sub>, Ag<sub>20</sub>Cu<sub>10</sub>Zn<sub>15</sub>Sn<sub>15</sub>S<sub>50</sub>, Ag<sub>15</sub>Cu<sub>15</sub>Zn<sub>15</sub>Sn<sub>15</sub>S<sub>50</sub>, Ag<sub>10</sub>Cu<sub>20</sub>Zn<sub>15</sub>Sn<sub>15</sub>S<sub>50</sub>, Ag<sub>5</sub>Cu<sub>25</sub>Zn<sub>15</sub>Sn<sub>15</sub>S<sub>50</sub>, Ag<sub>0</sub>Cu<sub>30</sub>Zn<sub>15</sub>Sn<sub>15</sub>S<sub>50</sub>.

The as-prepared colloids were purified by adding 2.5 mL 2-propanol to 5.0 mL colloidal solution followed by the centrifugation (5 min at 5000 rpm). The precipitate was separated, dissolved in a minimal amount of DI water and then diluted with more DI water to 1.0 mL.

### *Variation of silver content - Ag<sub>x</sub>ZnSnS<sub>4</sub> NCs.*

General protocol: (6-X) mL H<sub>2</sub>O + 0.3 mL 0.5 M SnCl<sub>2</sub> in 4 M NaOH + 0.1 mL 5 M NH<sub>4</sub>OH + 3.0 mL 1.0 M MAA + 0.15 mL 1.0 M Zn(NO<sub>3</sub>)<sub>2</sub> + X mL 0.1 M AgNO<sub>3</sub> + 0.4 mL 1.0 M Na<sub>2</sub>S. *Note:* all solutions are prepared in DI water. Heating: 7 min.

The following nominal compositions were prepared:

Ag<sub>0</sub>Zn<sub>15</sub>Sn<sub>15</sub>S<sub>40</sub> (X = 0)

Ag<sub>5</sub>Zn<sub>15</sub>Sn<sub>15</sub>S<sub>40</sub> (X = 0.5 mL)

Ag<sub>10</sub>Zn<sub>15</sub>Sn<sub>15</sub>S<sub>40</sub> (X = 1.0 mL)

Ag<sub>15</sub>Zn<sub>15</sub>Sn<sub>15</sub>S<sub>40</sub> (X = 1.5 mL)

Ag<sub>20</sub>Zn<sub>15</sub>Sn<sub>15</sub>S<sub>40</sub> (X = 2.0 mL)

Ag<sub>25</sub>Zn<sub>15</sub>Sn<sub>15</sub>S<sub>40</sub> (X = 2.5 mL)

Ag<sub>30</sub>Zn<sub>15</sub>Sn<sub>15</sub>S<sub>40</sub> (X = 3.0 mL)

The as-prepared colloids were purified by adding 5 mL 2-propanol to 10 mL colloidal solution followed by the centrifugation (5 min at 5000 rpm). The precipitate was separated, dissolved in a minimal amount of DI water and then diluted with more DI water to 1.0 mL.

*Variation of zinc content -  $\text{Ag}_2\text{Zn}_x\text{SnS}_4$  NC.*

General protocol: 3 mL  $\text{H}_2\text{O}$  + 0.3 mL 0.5 M  $\text{SnCl}_2$  in 4 M  $\text{NaOH}$  + 0.1 mL 5 M  $\text{NH}_4\text{OH}$  + 3.0 mL 1.0 M MAA + X mL 1.0 M  $\text{Zn}(\text{NO}_3)_2$  + 3.0 mL 0.1 M  $\text{AgNO}_3$  + 0.4 mL 1.0 M  $\text{Na}_2\text{S}$ . *Note:* all solutions are prepared in DI water. Heating: 10 min.

The following nominal compositions were prepared:

$\text{Ag}_{30}\text{Zn}_0\text{Sn}_{15}\text{S}_{40}$  (X = 0)

$\text{Ag}_{30}\text{Zn}_5\text{Sn}_{15}\text{S}_{40}$  (X = 0.5 mL)

$\text{Ag}_{30}\text{Zn}_{10}\text{Sn}_{15}\text{S}_{40}$  (X = 1.0 mL)

$\text{Ag}_{30}\text{Zn}_{15}\text{Sn}_{15}\text{S}_{40}$  (X = 1.5 mL)

$\text{Ag}_{30}\text{Zn}_{20}\text{Sn}_{15}\text{S}_{40}$  (X = 2.0 mL)

$\text{Ag}_{30}\text{Zn}_{25}\text{Sn}_{15}\text{S}_{40}$  (X = 2.5 mL)

$\text{Ag}_{30}\text{Zn}_{30}\text{Sn}_{15}\text{S}_{40}$  (X = 3.0 mL)

The as-prepared colloids were purified by adding 5 mL 2-propanol to 10 mL colloidal solution followed by the centrifugation (5 min at 5000 rpm). The precipitate was separated, dissolved in a minimal amount of DI water and then diluted with more DI water to 1.0 mL.

*Variation of tin content -  $\text{Ag}_2\text{ZnSn}_x\text{S}_4$  NC.*

General protocol: 3 mL  $\text{H}_2\text{O}$  + X mL 0.5 M  $\text{SnCl}_2$  in 4 M  $\text{NaOH}$  + 0.1 mL 5 M  $\text{NH}_4\text{OH}$  + 3.0 mL 1.0 M MAA + 0.15 mL 1.0 M  $\text{Zn}(\text{NO}_3)_2$  + 3.0 mL 0.1 M  $\text{AgNO}_3$  + 0.4 mL 1.0 M  $\text{Na}_2\text{S}$ . *Note:* all solutions are prepared in DI water. Heating: 7 min.

The following nominal compositions were prepared:

$\text{Ag}_{30}\text{Zn}_{15}\text{Sn}_0\text{S}_{40}$  (X = 0.25 mL)

$\text{Ag}_{30}\text{Zn}_{15}\text{Sn}_{2.5}\text{S}_{40}$  (X = 0.25 mL)

$\text{Ag}_{30}\text{Zn}_{15}\text{Sn}_{5.0}\text{S}_{40}$  (X = 0.35 mL)

$\text{Ag}_{30}\text{Zn}_{15}\text{Sn}_{7.5}\text{S}_{40}$  (X = 0.40 mL)

$\text{Ag}_{30}\text{Zn}_{15}\text{Sn}_{10}\text{S}_{40}$  (X = 0.45 mL)

$\text{Ag}_{30}\text{Zn}_{15}\text{Sn}_{12.5}\text{S}_{40}$  (X = 0.50 mL)

$\text{Ag}_{30}\text{Zn}_{15}\text{Sn}_{15}\text{S}_{40}$  (X = 1.00 mL)

The as-prepared colloids were purified by adding 2.5 mL 2-propanol to 5.0 mL colloidal solution followed by the centrifugation (5 min at 5000 rpm). The precipitate was separated, dissolved in a minimal amount of DI water and then diluted with more DI water to 1.0 mL.

*Variation of sulfur content -  $\text{Ag}_2\text{ZnSnS}_x$  NCs.*

General protocol: 3 mL  $\text{H}_2\text{O}$  + 0.3 mL 0.5 M  $\text{SnCl}_2$  in 4 M  $\text{NaOH}$  + 0.1 mL 5 M  $\text{NH}_4\text{OH}$  + 3.0 mL 1.0 M MAA + 0.15 mL 1.0 M  $\text{Zn}(\text{NO}_3)_2$  + 3.0 mL 0.1 M  $\text{AgNO}_3$  + X mL 1.0 M  $\text{Na}_2\text{S}$ . *Note:* all solutions are prepared in DI water. Heating: 5 min.

The following nominal compositions were prepared:

$\text{Ag}_{30}\text{Zn}_{15}\text{Sn}_{15}\text{S}_{25}$  (X = 0.25 mL)

$\text{Ag}_{30}\text{Zn}_{15}\text{Sn}_{15}\text{S}_{30}$  (X = 0.25 mL)

$\text{Ag}_{30}\text{Zn}_{15}\text{Sn}_{15}\text{S}_{35}$  (X = 0.35 mL)

$\text{Ag}_{30}\text{Zn}_{15}\text{Sn}_{15}\text{S}_{40}$  (X = 0.40 mL)

$\text{Ag}_{30}\text{Zn}_{15}\text{Sn}_{15}\text{S}_{45}$  (X = 0.45 mL)

$\text{Ag}_{30}\text{Zn}_{15}\text{Sn}_{15}\text{S}_{50}$  (X = 0.50 mL)

$\text{Ag}_{30}\text{Zn}_{15}\text{Sn}_{15}\text{S}_{100}$  (X = 1.00 mL)

The as-prepared colloids were purified by adding 2.5 mL 2-propanol to 5.0 mL colloidal solution followed by the centrifugation (5 min at 5000 rpm). The precipitate was separated, dissolved in a minimal amount of DI water and then diluted with more DI water to 1.0 mL.

*Variation of both silver and zinc content -  $\text{Ag}_x\text{Zn}_y\text{SnS}_4$  NCs.*

General protocol: 3 mL  $\text{H}_2\text{O}$  + 0.3 mL 0.5 M  $\text{SnSO}_4$  in 4 M  $\text{NaOH}$  + 0.1 mL 5 M  $\text{NH}_4\text{OH}$  + 3.0 mL 1.0 M MAA + X mL 1.0 M  $\text{Zn}(\text{NO}_3)_2$  + 2X mL 0.1 M  $\text{AgNO}_3$  + 0.4 mL 1.0 M  $\text{Na}_2\text{S}$ . *Note:* all solutions are prepared in DI water. Heating: 10 min.

The following nominal compositions were prepared:

$\text{Ag}_0\text{Zn}_{15}\text{Sn}_{15}\text{S}_{40}$  ( $X = 0$ )

$\text{Ag}_5\text{Zn}_{12.5}\text{Sn}_{15}\text{S}_{40}$  ( $X = 0.025$  mL)

$\text{Ag}_{10}\text{Zn}_{10}\text{Sn}_{15}\text{S}_{40}$  ( $X = 0.050$  mL)

$\text{Ag}_{15}\text{Zn}_7.5\text{Sn}_{15}\text{S}_{40}$  ( $X = 0.075$  mL)

$\text{Ag}_{20}\text{Zn}_5\text{Sn}_{15}\text{S}_{40}$  ( $X = 0.100$  mL)

$\text{Ag}_{25}\text{Zn}_{2.5}\text{Sn}_{15}\text{S}_{40}$  ( $X = 0.125$  mL)

$\text{Ag}_{30}\text{Zn}_{15}\text{Sn}_{15}\text{S}_{40}$  ( $X = 0.150$  mL)

The as-prepared colloids were purified by adding 2.5 mL 2-propanol to 5.0 mL colloidal solution followed by the centrifugation (5 min at 5000 rpm). The precipitate was separated, dissolved in a minimal amount of DI water and then diluted with more DI water to 1.0 mL.

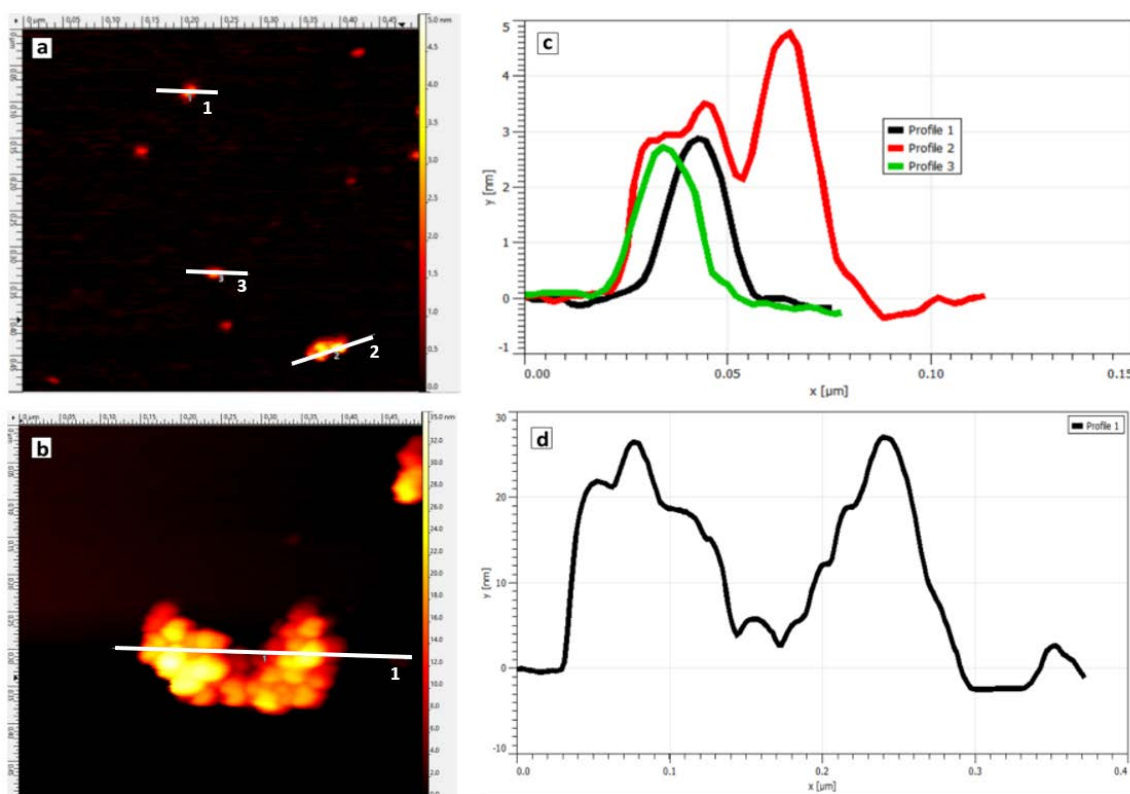

**Figure S1.** AFM images (a,b) and profiles (c,d) of separate AZTS NCs (a,c) and a NC aggregate (b,d).

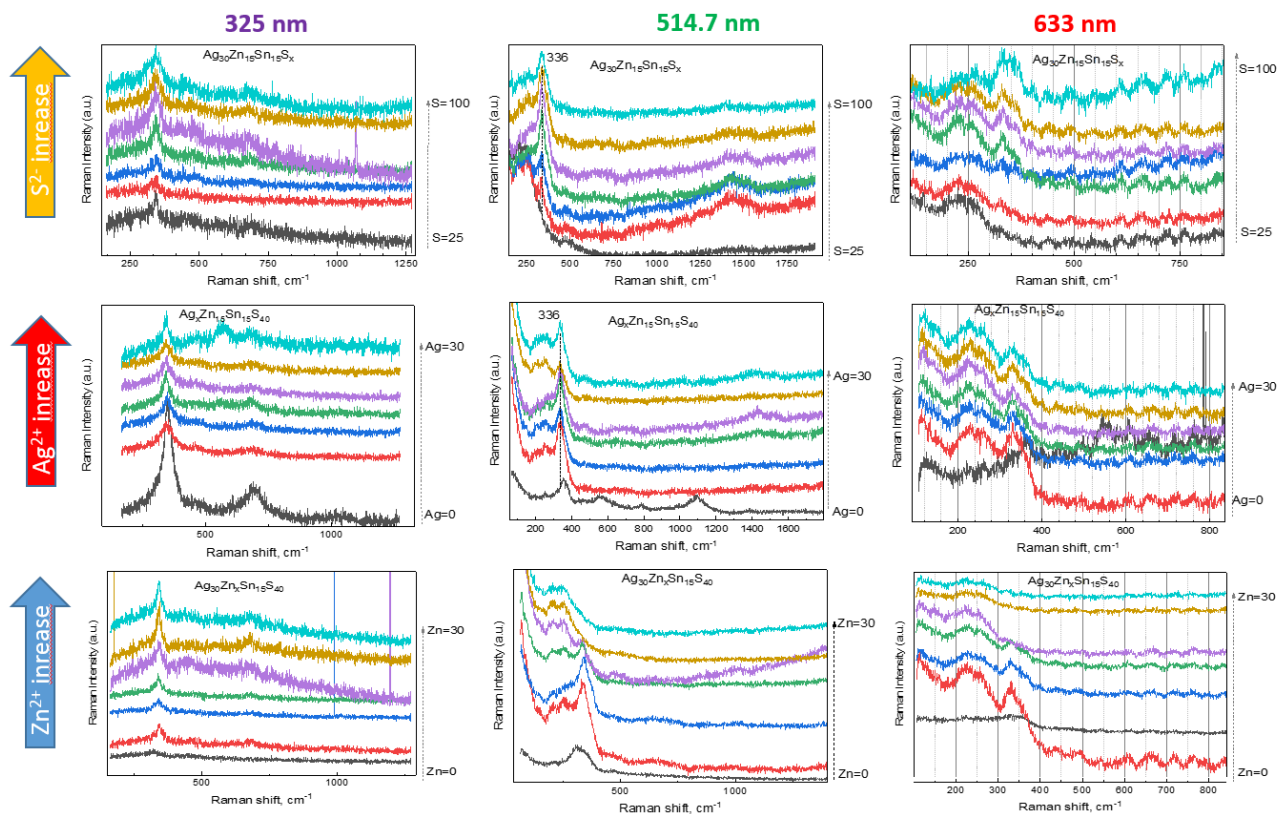

**Figure S2.** A comparative plot of normalized Raman spectra of S-, Ag-, and Zn-series of Ag-Zn-Sn-S NCs at  $\lambda_{exc}=325$  nm, 514.7 nm (b), and 633 nm (c).

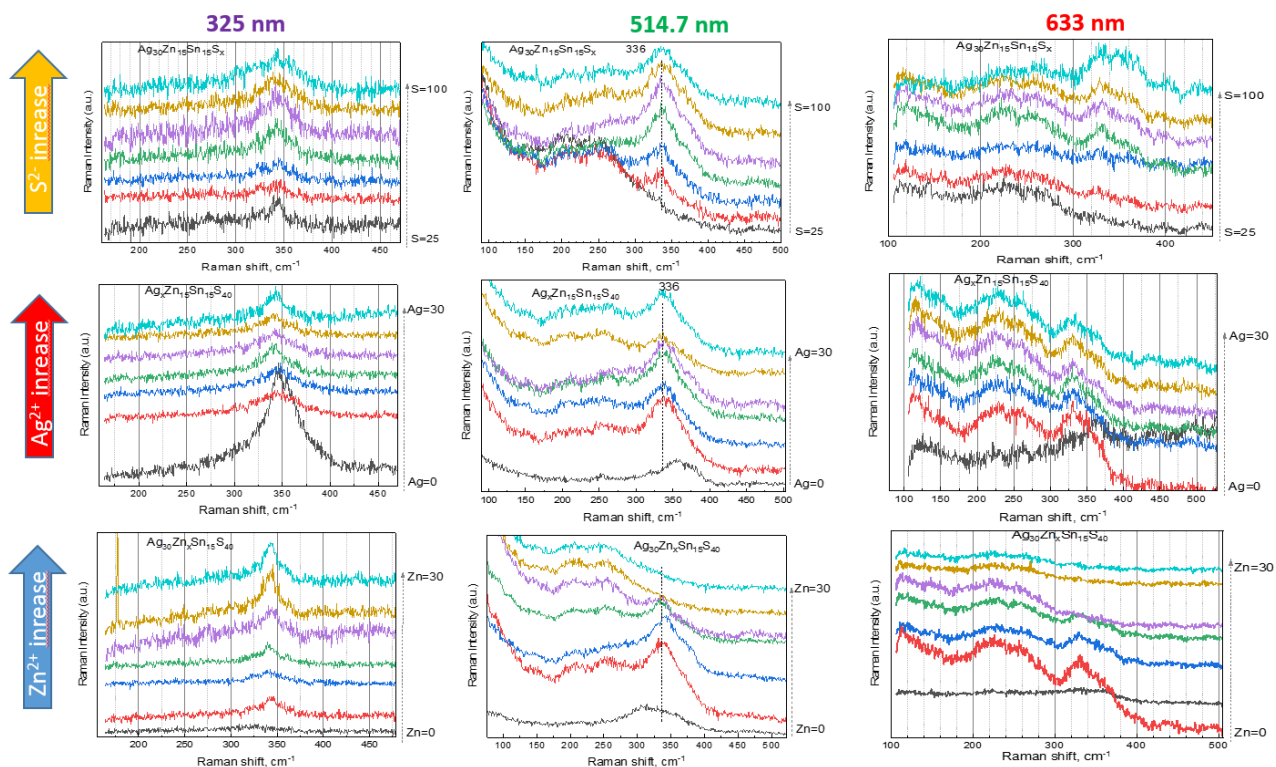

**Figure S3.** A comparative plot of as-measured Raman spectra of S-, Ag-, and Zn-series of Ag-Zn-Sn-S NCs at  $\lambda_{exc}=325$  nm, 514.7 nm (b), and 633 nm (c).

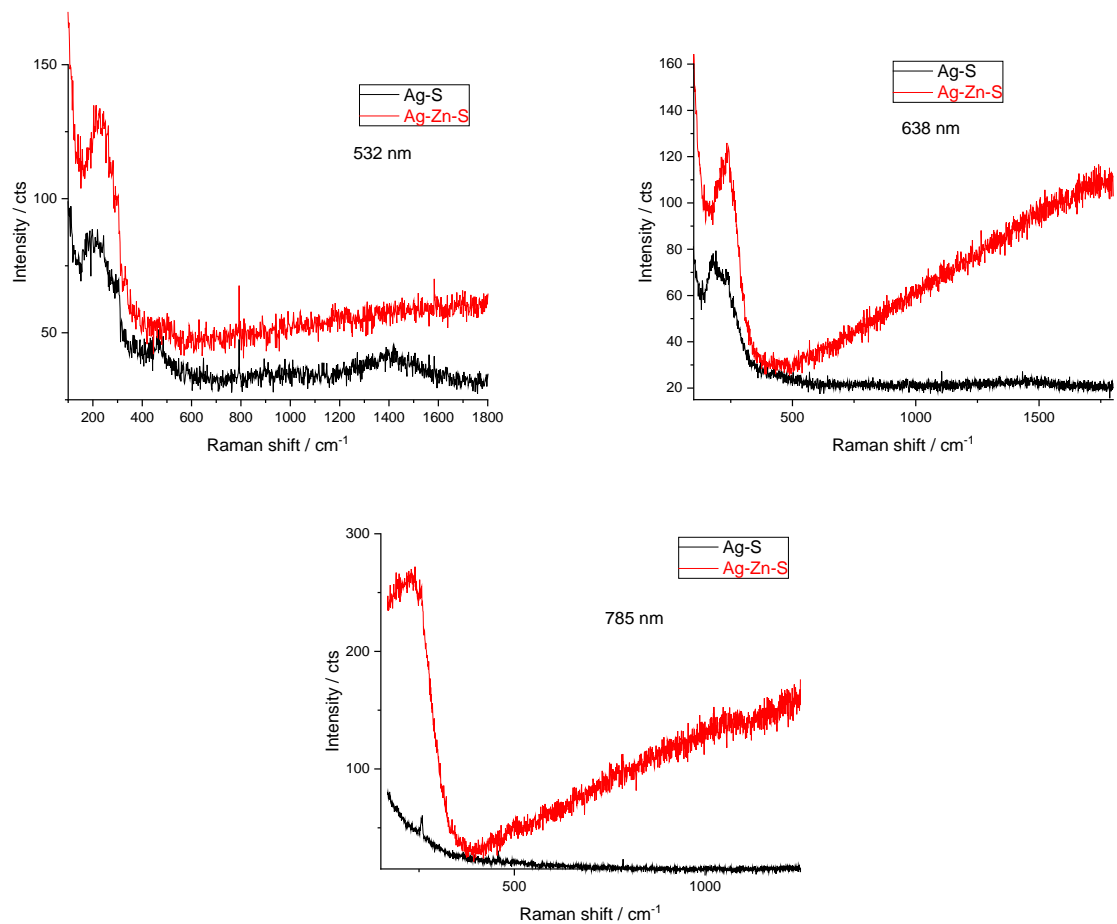

**Figure S4.** Raman spectra of Ag-S and Ag-Zn-S NCs at  $\lambda_{\text{exc}}=532$  nm (a), 638 nm (b), and 785 nm (c).

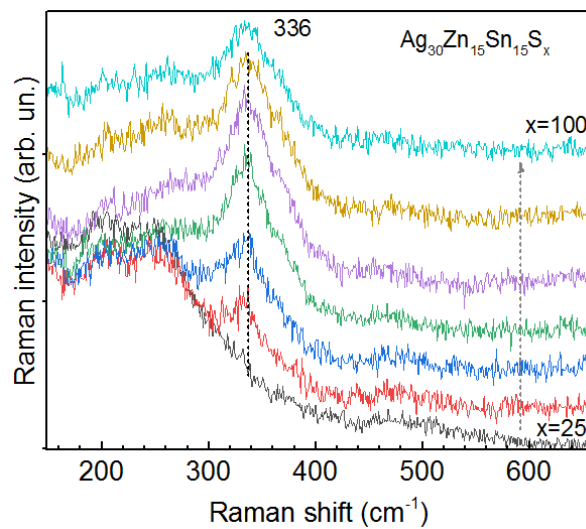

**Figure S5.** Raman spectra of  $\text{Ag}_2\text{ZnSnS}_x$  NC series ( $\lambda_{\text{exc}}=514.7$  nm).
