# Supplementary material for: Raman and X-ray Photoelectron Spectroscopic Study of Aqueous Thiol-Capped Ag-Zn-Sn-S Nanocrystals
Source: Preprints.org preprint supplement (doi:10.20944/preprints202105.0715.v1), 2021-05-31
Supplement: Supplementary file 2 [file supplementary]

Archive with 1 entries (1 files):
- ms_ACZTS_Raman_SI_6Z.pdf
